# Supplementary material for: PAPP5 Is Involved in the Tetrapyrrole Mediated Plastid Signalling during Chloroplast Development
Source: PubMed Central journal article supplement (PMC3612061; doi:10.1371/journal.pone.0060305), 2013-03-29

# Supplemental Figure4

**A**

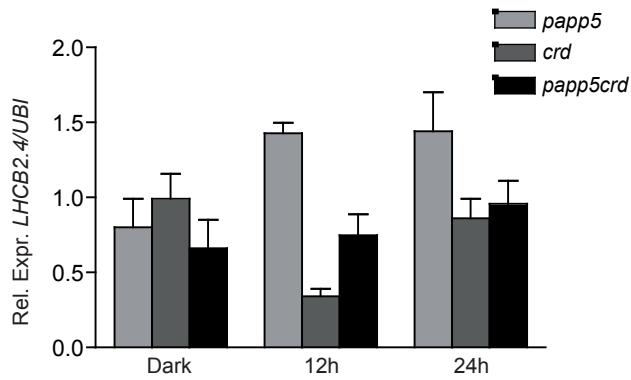

**B**

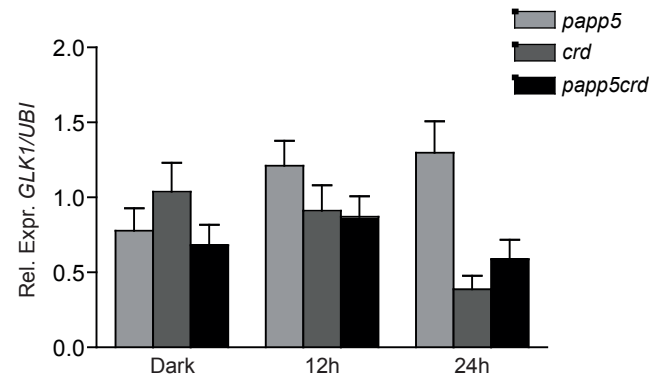

**C**

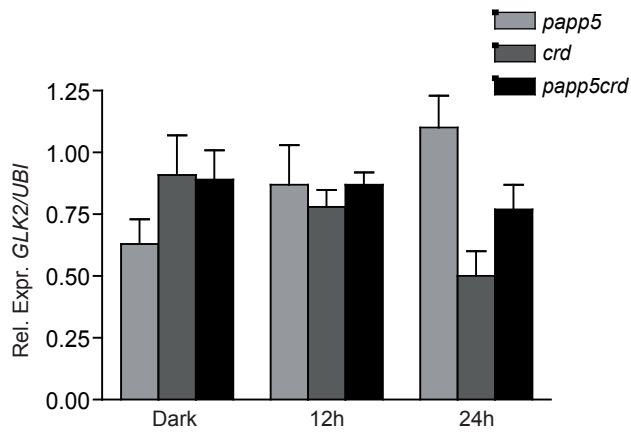

**D**

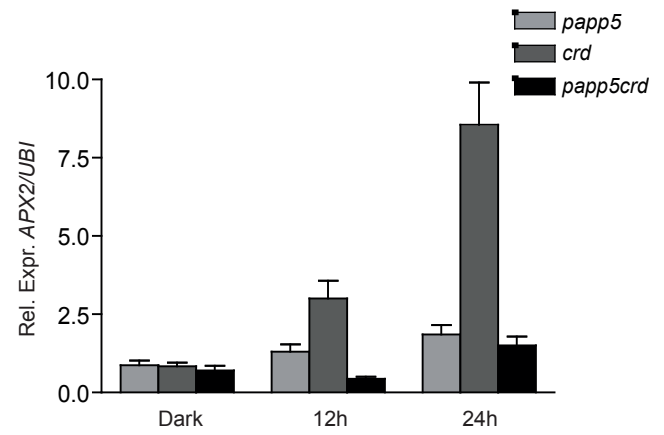

**E**

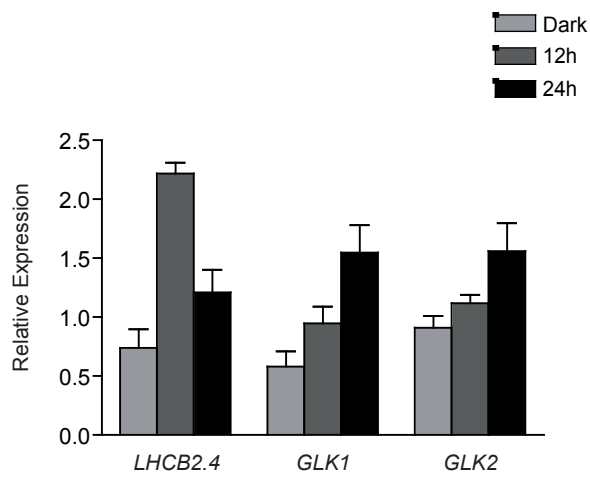

Supplement: pone.0060305.s004.pdf [file pone.0060305.s004.pdf]
