# Supplementary material for: PAPP5 Is Involved in the Tetrapyrrole Mediated Plastid Signalling during Chloroplast Development
Source: PubMed Central journal article supplement (PMC3612061; doi:10.1371/journal.pone.0060305), 2013-03-29

# Supplemental Figure 5

## A

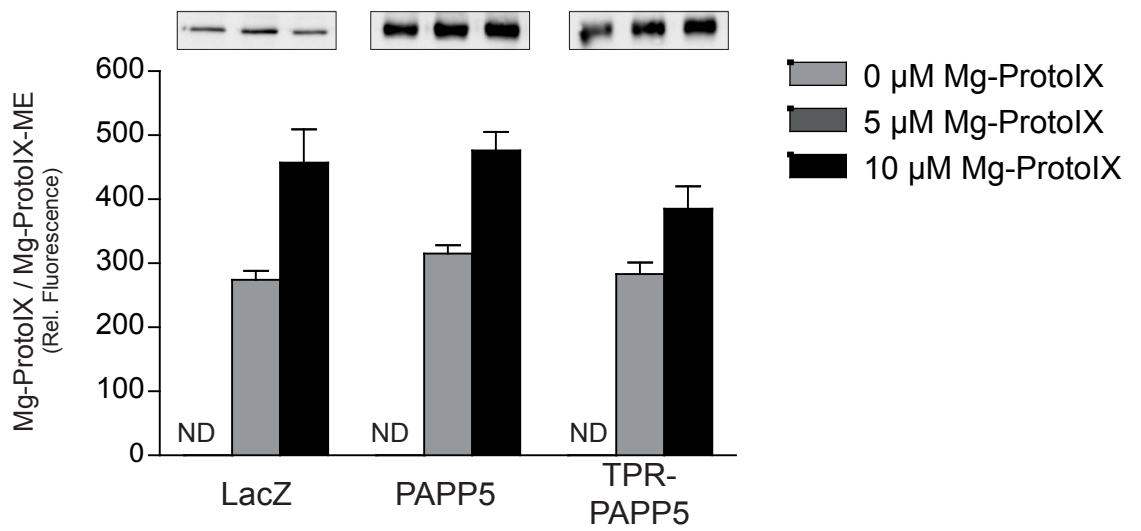

## B

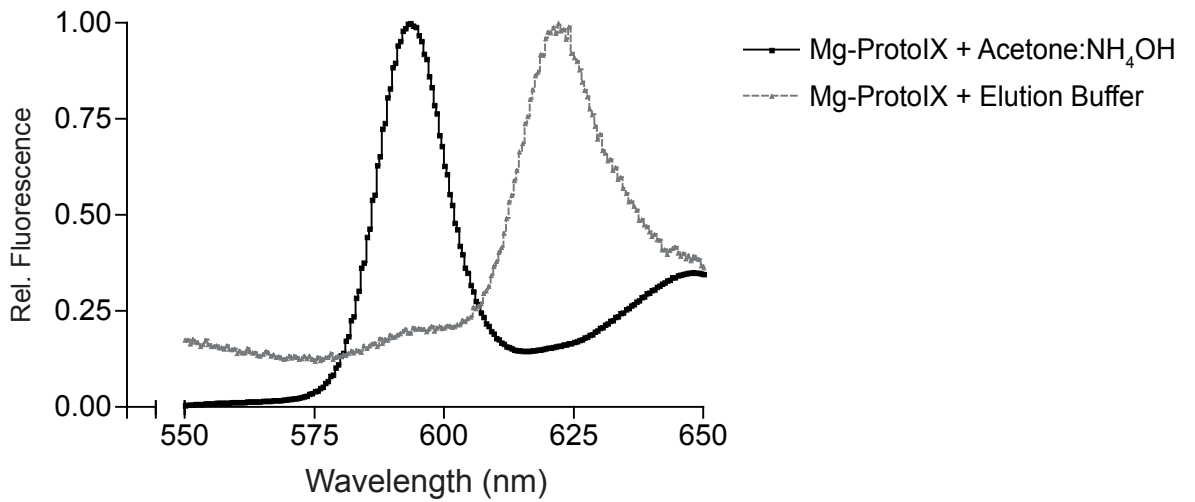

Supplement: pone.0060305.s005.pdf [file pone.0060305.s005.pdf]
